# Supplementary material
Source: PubMed Central journal article supplement (PMC8096119)
Supplement: NIHMS1688691-supplement-Supp.pdf [file NIHMS1688691-supplement-Supp.pdf]

## Supplementary Table

*Means, Standard Deviations, and Cronbach's Alphas for Validity Assessment Surveys*

|                               | US sample         |           |          | Canadian sample |           |          |
|-------------------------------|-------------------|-----------|----------|-----------------|-----------|----------|
|                               | <i>M</i>          | <i>SD</i> | <i>α</i> | <i>M</i>        | <i>SD</i> | <i>α</i> |
| Avenge self <sup>a</sup>      | 1.63              | .67       | .80      | 1.66            | 0.66      | .79      |
| Avenge peer <sup>a</sup>      | 1.61              | .63       | .80      | 1.58            | 0.72      | .86      |
| Reconcile self <sup>a</sup>   | 2.81              | 1.13      | .74      | 2.97            | 1.03      | .77      |
| Reconcile peer <sup>a</sup>   | 2.81              | 1.13      | .83      | 2.80            | 1.12      | .83      |
| Suppress anger <sup>b</sup>   | 3.70              | 1.24      | .84      | 3.86            | 1.21      | .86      |
| Victimized self <sup>c</sup>  | 3.03              | 2.74      | na       | 1.52            | 2.01      | na       |
| Victimized peers <sup>c</sup> | 3.56              | 3.08      | na       | 1.63            | 1.57      | na       |
| Racist events <sup>d</sup>    | 0.67 <sup>d</sup> | .54       | .88      | 0.37            | 0.40      | .83      |

*Note.*  $N = 267$ , U.S. sample.  $N = 331$ .

<sup>a</sup> Range = 1 (not at all) to 5 (Did a lot). <sup>b</sup> Range = 1 (almost never) to 6 (almost always).

<sup>c</sup>Range = 0 to 9 events in the past month. <sup>d</sup> Total discrimination ratings for the past year, item range = 1 (never) to 3 (often).
